# Supplementary material for: Patient perspectives of nuisance bleeding and adherence to dual antiplatelet therapy: a qualitative study
Source: HighWire-hosted journal article supplement (doi:10.1136/openhrt-2020-001405), 2020-10-01
Supplement: openhrt-2020-001405supp001_data_supplement.pdf [file openhrt-2020-001405supp001_data_supplement.pdf]

## Patient focus groups

### Topic guide

- **Thank you for coming along**
- **Introduce facilitator and co-facilitator.**
- **Set ground rules e.g. respect each other's opinions**
- **Invite each participant to introduce themselves, giving first name only.**

The facilitator will encourage discussions around **participants' healthcare-seeking behaviour in relation to bleeding while on DAPT**. The questions and prompts below will be used flexibly to stimulate responses and discussion.

#### 1. Information about DAPT

##### a. Participants' level of knowledge of DAPT

- Were you told about what your medication does while you were in hospital?
- *Were you told about the side effects? Did you understand what you were told?*
- Were you clear about how long to take the medication for?
- Did you read the information leaflets? How helpful did you find them?
- Did you access any other information (internet, healthcare professionals, friends and family)?
- *Would you have liked more information? In what format?*

#### 2. Issues related to adherence

- Do you try and take your medication regularly as prescribed?
- When might you miss a dose?
- What do you do if you miss a dose?
- What are the barriers/facilitators to taking your medication regularly as prescribed?

#### 3. Issues related to bleeding

As some of you have discussed, some people develop some bruising and bleeding as a result of taking the medication.

- Has this happened to you? What sort of bleeding did you experience?
- Did/ would this cause you concern?
- Did/ would you contact your GP (or another healthcare professional) about this?
- At what point would bleeding become a problem for you?

#### CLOSING DISCUSSION

Take it in turns to raise the most significant ways in which this medication has impacted/you expect it to impact on your quality of life, whether in positive, or negative ways
